# Supplementary material
Source: publisher figshare collection journal article supplement (https://karger.figshare.com/ndownloader/files/30750343)
Supplement: Supplementary file 1 [file 30750343]

**Table S3. Results of data preprocessing statistics and quality control.**

| **Sample** | **Raw**  **reads** | **Clean**  **Reads** | **Base**  **(nt)** | **AvgLen**  **(nt)** | **Q20** | **GC**  **(%)** | **Effective**  **(%)** |
| --- | --- | --- | --- | --- | --- | --- | --- |
| D01 | 83350 | 80061 | 20277436 | 253 | 89.92 | 53.9 | 96.05 |
| D02 | 82502 | 80165 | 20327452 | 253 | 91.93 | 54.63 | 97.17 |
| D03 | 86084 | 80142 | 20327750 | 253 | 92.63 | 52.83 | 93.10 |
| D11 | 82325 | 80059 | 20340824 | 254 | 88.15 | 55.44 | 97.25 |
| D12 | 83385 | 80066 | 20291090 | 253 | 87.39 | 56.79 | 96.02 |
| D13 | 84490 | 80172 | 20410293 | 254 | 83.60 | 55.11 | 94.89 |
| D21 | 82570 | 80089 | 20174702 | 251 | 90.03 | 53.28 | 97.00 |
| D22 | 87099 | 80094 | 20268208 | 253 | 90.30 | 54.17 | 91.96 |
| D23 | 87414 | 80098 | 20265186 | 253 | 89.22 | 52.18 | 91.63 |
| D31 | 87479 | 80182 | 20176208 | 251 | 89.29 | 53.15 | 91.66 |
| D32 | 83090 | 80083 | 20307547 | 253 | 86.92 | 52.69 | 96.38 |
| D33 | 83209 | 80121 | 20217515 | 252 | 89.99 | 53.80 | 96.29 |
